# Supplementary material
Source: Springer Nature journal article supplement (https://www.springermedizin.de/resource/supplementary/12889_2012_4549_MOESM3_ESM.pdf/9492186)

**Steps/Schoolday****GIRLS****INTERVENTION (n=43)****CONTROL (n=41)**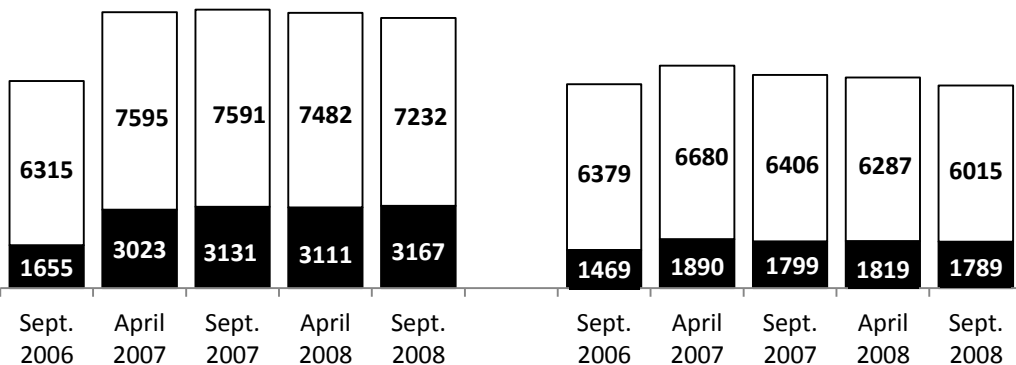**Steps/Schoolday****BOYS****INTERVENTION (n=45)****CONTROL (n=47)**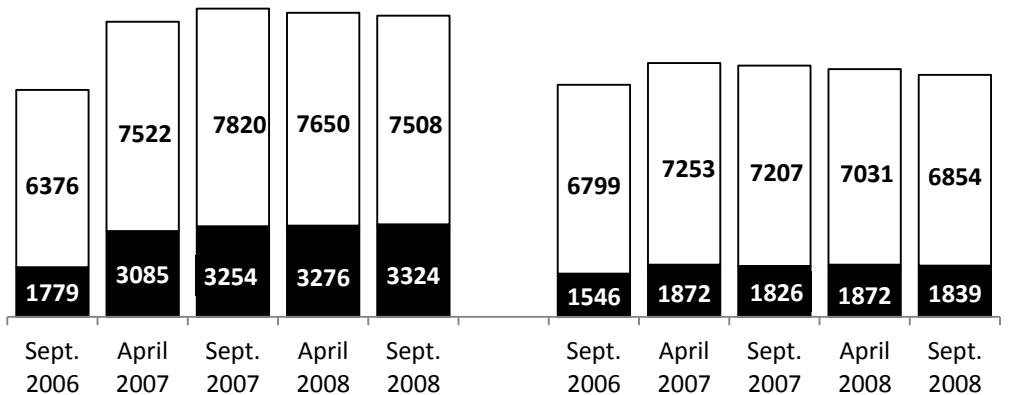

Supplement: MOESM3 [file 9492186]
